# Supplementary material for: Proteomic Studies of Roots in Hypoxia-Sensitive and -Tolerant Tomato Accessions Reveal Candidate Proteins Associated with Stress Priming
Source: MDPI journal article supplement (doi:10.3390/cells11030500), 2022-01-31
Supplement: s1 [file s1]

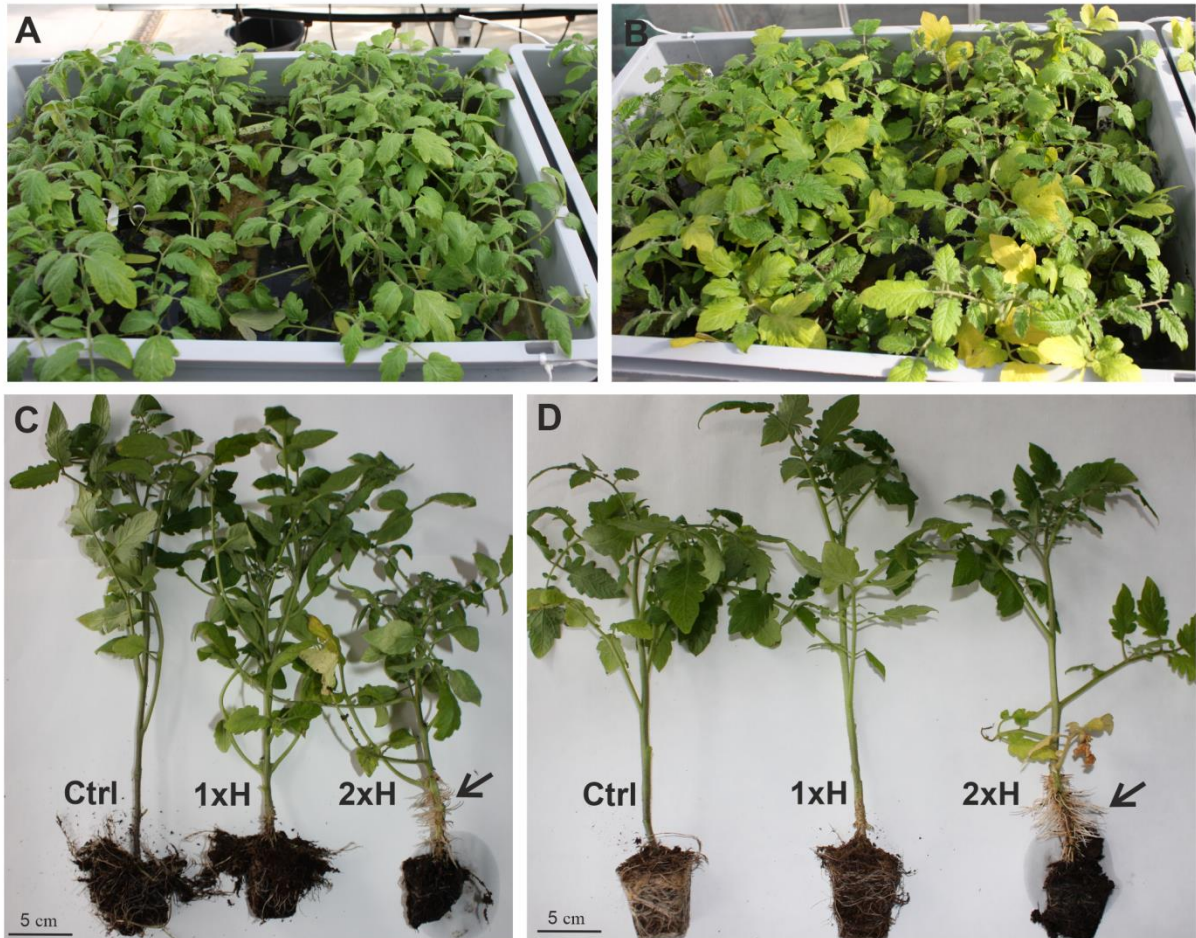

**Supplementary Figure S1.** The plants of POL 7/15 (A) and PZ 215 (B) tomato accessions which were exposed to hypoxia stress for 7 days by waterlogging (1xH). After that, plants were taken out of the water and stayed unstressed for 14 days (Rec). Next, plants from the 1xH group were waterlogged for the second time for another 7 days (2xH). At 28 day of the experiment control plants (Ctrl), plants after first (1xH) and second (2xH) waterlogging of POL 7/15 and PZ 215 tomato accessions are presented in the pictures C and D, respectively. The arrow marks the adventitious roots growing on the shoot under the waterlogging stress.



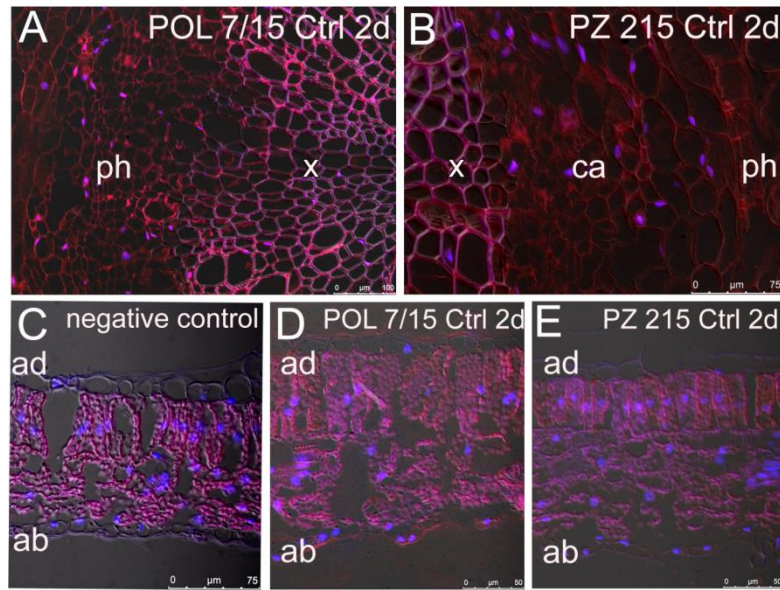

**Supplementary Figure S3.** Steedman's Wax embedded cross sections of leaves and roots of *Solanum lycopersicum*. A and D Root and leaf tissue of POL 7/15 accession control plants after 2 days; the signal in all of the tissue (i.e. phloem, *ph* or xylem, *x*) of taproot and chloroplasts in palisade mesophyll cells on the adaxial side of the leaf (*ad*), and in the spongy mesophyll on the abaxial side of the leaf (*ab*). C Leaf tissue labelled omitting the primary antibody; lack of signal in all of the tissue (i.e. cortex cells, *co* apart from autofluorescent signal of xylem, *x* of lateral roots *LR*, and chloroplasts in palisade mesophyll cells on the adaxial side of the leaf (*ad*), and in the spongy mesophyll on the abaxial side of the leaf (*ab*). B and E Root and leaf tissue of PZ 215 accession control plants after 2 days; the signal in all of the tissue (i.e. phloem, *ph*; cambium, *ca* or parenchymal cells of xylem, *x*) of taproot and chloroplasts in palisade mesophyll cells on the adaxial side of the leaf (*ad*), and in the spongy mesophyll on the abaxial side of the leaf (*ab*). Scale bar = 100  $\mu\text{m}$  (A), 75  $\mu\text{m}$  (B, C), 50  $\mu\text{m}$  (D, E)



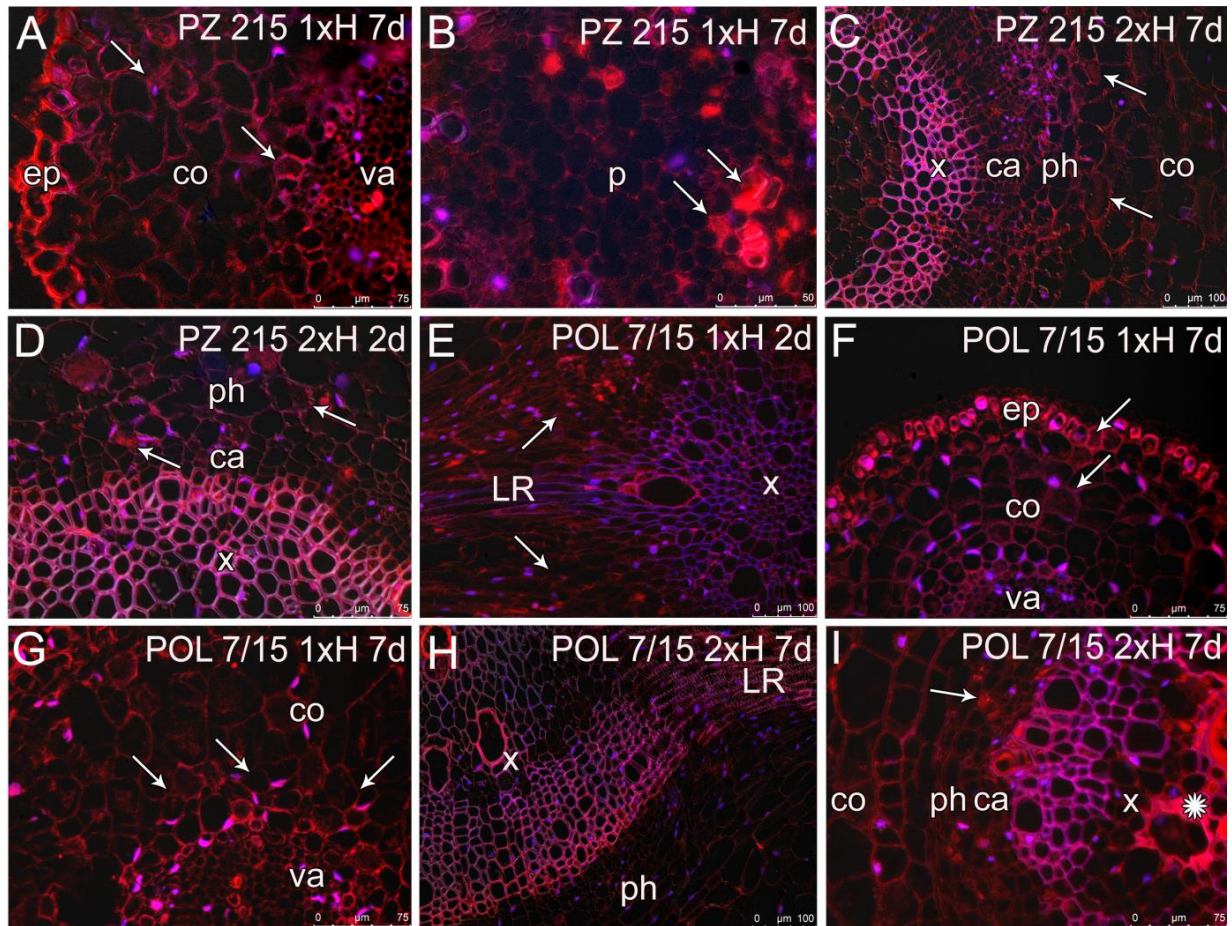

**Supplementary Figure S4.** Steedman's Wax embedded cross sections of the *Solanum lycopersicum* PZ 215 accession taproot and lateral roots after the first (1xH, A, B) and second (2xH, C, D) waterlogging, and POL 7/15 accession tap root and lateral roots after the first (1xH, E – G) and second (2xH, H – I) waterlogging. A: The ADH signal in lateral roots is mainly noted in the cytoplasm of cortex cells (co) and in vascular tissues (va), as well as in epidermal cells (ep). B: A magnification of the details from C; parenchymal cells of pith (pt) with an accumulation of ADH in a few cells (arrows). C and D: ADH activity labelled mainly in phloem cells (ph) in the taproot and cortex cells (arrows); the signal detected in cambium (ca) or parenchymal cells of xylem (x). E: Part of the stem of the taproot with lateral root (LR) formation; the ADH signal observed in vascular tissues: phloem (ph, arrows) and in parenchymal cells of xylem (x), cambium (ca), surrounding cortex cells (co) of the taproot. F The ADH signal in lateral roots is mainly noted (arrows) in the cytoplasm of cortex cells (co) and in epidermal cells (ep), the signal labelled in vascular tissue (va). G A magnification of the details from F. H and I The signal of ADH detected only in a few cells of phloem (ph, arrow) and a few parenchymal cells of the xylem (x, arrow); a near absence of signal detected in xylem (x) cambium (ca) and cortex cells (co) of lateral roots; autofluorescence of vascular elements which represent a strong signal are marked by asterisk. Scale bar = 100  $\mu\text{m}$  (C, E, H), 75  $\mu\text{m}$  (A, D, F, G, I), 50  $\mu\text{m}$  (B)

**Supplementary Table S1.** Mean value of 18 morphological and physiological parameters estimated in control and plants exposed to 7 days-hypoxia stress of two tomato accessions POL 7/15 and PZ 215. Bold p-values and indicated cells in gray indicate statistically significant differences between control and stressed plants of each accession separately estimated with Student's t-test and  $p < 0.05$ . According to published data by Kolton et al. (2020) [17].

| Parameter                        | POL 7/15<br>Control | POL 7/15<br>Stress | p-Value       | PZ 215<br>Control | PZ 215<br>Stress | p-Value       |
|----------------------------------|---------------------|--------------------|---------------|-------------------|------------------|---------------|
| % weight change                  | 100                 | 117                | <b>0.0005</b> | 100               | 109              | <b>0.0332</b> |
| % height change                  | 100                 | 70                 | <b>0.0239</b> | 100               | 11               | <b>0.0000</b> |
| Relative leaf number             | 1.10                | 1.05               | 0.8010        | 0.53              | 0.16             | <b>0.0160</b> |
| F <sub>0</sub>                   | 441                 | 447                | 0.6030        | 456               | 677              | <b>0.0069</b> |
| F <sub>m</sub>                   | 2259                | 2317               | 0.5088        | 2371              | 2211             | 0.0645        |
| F <sub>v</sub>                   | 1818                | 1869               | 0.5695        | 1915              | 1534             | <b>0.0053</b> |
| F <sub>v</sub> /F <sub>0</sub>   | 4.17                | 4.20               | 0.9211        | 4.22              | 2.82             | <b>0.0014</b> |
| F <sub>v</sub> /F <sub>m</sub>   | 0.80                | 0.81               | 0.5391        | 0.81              | 0.68             | <b>0.0034</b> |
| T <sub>fm</sub>                  | 178                 | 191                | 0.3619        | 183               | 244              | <b>0.0000</b> |
| Area                             | 19,874              | 20,181             | 0.8558        | 20,171            | 13,332           | <b>0.0010</b> |
| F <sub>m</sub> /F <sub>0</sub>   | 5.17                | 5.20               | 0.9215        | 5.22              | 3.82             | <b>0.0014</b> |
| PI ABS                           | 1.13                | 0.95               | 0.3583        | 0.97              | 0.43             | <b>0.0008</b> |
| ABS/RC                           | 3.15                | 3.18               | 0.8164        | 3.20              | 5.13             | <b>0.0009</b> |
| TR <sub>0</sub> /RC              | 2.51                | 2.56               | 0.3718        | 2.58              | 3.22             | <b>0.0000</b> |
| ET <sub>0</sub> /RC              | 1.04                | 1.05               | 0.8469        | 1.04              | 0.97             | 0.3251        |
| DI <sub>0</sub> /RC              | 0.65                | 0.62               | 0.6056        | 0.62              | 1.91             | <b>0.0051</b> |
| ET <sub>0</sub> /ABS             | 0.34                | 0.33               | 0.7765        | 0.33              | 0.23             | <b>0.0019</b> |
| ET <sub>0</sub> /TR <sub>0</sub> | 0.42                | 0.41               | 0.7011        | 0.41              | 0.31             | <b>0.0036</b> |

**Supplementary Table S2.** Experimental design for protein labeling. Pool served as an internal standard and consisted of equal amounts of each sample analyzed in 2D-DIGE.

| <b>Gel number</b> | <b>Cy2-labeled</b> | <b>Cy3-labeled</b> | <b>Cy5-labeled</b> |
|-------------------|--------------------|--------------------|--------------------|
| Gel 1             | Pool               | PZ 215 Ctrl-1      | PZ 215 2xH-39      |
| Gel 2             | Pool               | PZ 215 Ctrl-3      | PZ 215 1xH-17      |
| Gel 3             | Pool               | POL 7/15 Ctrl-9    | POL 7/15 Rec-36    |
| Gel 4             | Pool               | PZ 215 1xH-15      | POL 7/15 Ctrl-12   |
| Gel 5             | Pool               | POL 7/15 1xH-19    | POL 7/15 2xH-48    |
| Gel 6             | Pool               | POL 7/15 1xH-23    | PZ 215 Rec-30      |
| Gel 7             | Pool               | PZ 215 Rec-27      | PZ 215 2xH-38      |
| Gel 8             | Pool               | PZ 215 Rec-28      | POL 7/15 Rec-35    |
| Gel 9             | Pool               | POL 7/15 Rec-33    | POL 7/15 1xH-24    |
| Gel 10            | Pool               | PZ 215 2xH-37      | PZ 215 1xH-16      |
| Gel 11            | Pool               | POL 7/15 2xH-43    | POL 7/15 Ctrl-11   |
| Gel 12            | Pool               | POL 7/15 2xH-45    | PZ 215 Ctrl-56     |

**Supplementary Table S3.** Correlations between PCs and the different quantitative variable spots. Protein spot abundance clustering based on PCA. For each PC, two clusters of proteins were identified that were positively and negatively correlated with the PC. The degree of protein abundance change within a specific PC was measured by the slope of regression of log-transformed protein abundance versus the corresponding eigenvector multiplied by the range of values within the eigenvector. If the degree of protein abundance change exceeded the onefold change threshold, the protein spot was considered to be associated with the PC. Protein clustering was performed sequentially starting from the first PC. Proteins that were already clustered with a PC were not included in the clusters associated with subsequent PCs and were presented as **Figure 2E** and **Figure 2F** for PZ 215 and POL 7/15 tomato accessions, respectively.

| Tomato accession | PC number | Direction | # Spot | Protein name                                            | LogChange | Correlation |
|------------------|-----------|-----------|--------|---------------------------------------------------------|-----------|-------------|
| PZ 215           | PC1       | Positive  | 4482   | Water-stress inducible protein 3                        | 0.703     | 0.725       |
|                  |           |           | 4792   | S-adenosylmethionine synthase                           | 0.537     | 0.811       |
|                  |           | Negative  | 4784   | Osmotin-like protein                                    | -0.482    | -0.703      |
|                  | PC2       | Negative  | 530    | Subtilisin-like protease                                | -0.709    | -0.821      |
|                  |           |           | 1106   | S-adenosylmethionine synthase                           | -0.508    | -0.810      |
|                  |           |           | 1294   | Peroxidase 4                                            | -0.310    | -0.860      |
|                  |           |           | 1796   | Actin                                                   | -0.363    | -0.733      |
|                  |           |           | 2602   | Wound/stress protein                                    | -0.789    | -0.992      |
|                  |           |           | 2662   | Glyceraldehyde 3-phosphate dehydrogenase                | -0.692    | -0.927      |
|                  |           |           | 2944   | Porin/voltage-dependent anion-selective channel protein | -0.487    | -0.813      |
|                  |           |           | 3892   | Alcohol dehydrogenase 2                                 | -0.664    | -0.900      |
|                  |           |           | 3934   | Alcohol dehydrogenase 2                                 | -0.862    | -0.998      |
|                  |           |           | 4117   | Heat shock protein                                      | -0.374    | -0.966      |
|                  |           |           | 4209   | Kunitz-type protease inhibitor                          | -0.553    | -0.945      |
|                  |           |           | 4327   | Chitinase                                               | -0.342    | -0.820      |
|                  |           |           | 4406   | Wound/stress protein                                    | -0.404    | -0.873      |
|                  |           |           | 4408   | Glycine-rich RNA-binding protein                        | -0.611    | -0.754      |
|                  |           |           | 4467   | Glyceraldehyde-3-phosphate dehydrogenase                | -0.688    | -0.876      |
|                  |           |           | 4477   | Pathogenesis-related protein-1                          | -0.584    | -0.981      |
|                  |           |           | 4514   | Wound/stress protein                                    | -0.519    | -0.961      |
|                  |           |           | 4526   | Wound/stress protein                                    | -0.833    | -0.970      |
|                  |           |           | 4559   | Thiosulfate sulfurtransferase rhodanese domain protein  | -0.751    | -0.968      |
|                  |           |           | 4768   | Chitinase                                               | -0.459    | -0.834      |

|          |     |          |      |                                                        |        |        |
|----------|-----|----------|------|--------------------------------------------------------|--------|--------|
| POL 7/15 | PC1 | Positive | 4839 | Peptidyl-prolyl cis-trans isomerase                    | 0.335  | 0.775  |
|          |     |          | 3446 | Nuclear RNA binding protein                            | -0.565 | -0.942 |
|          |     | Negative | 3566 | Alcohol dehydrogenase 2                                | -0.836 | -0.926 |
|          |     |          | 4559 | Thiosulfate sulfurtransferase rhodanese domain protein | -0.557 | -0.775 |
|          | PC2 |          | 530  | Subtilisin-like protease                               | -0.539 | -0.812 |
|          |     | Negative | 3652 | Peroxidase                                             | -0.504 | -0.867 |
|          |     |          | 3934 | Alcohol dehydrogenase 2                                | -0.599 | -0.775 |
|          | PC3 |          | 2602 | Wound/stress protein                                   | -0.456 | -0.902 |
|          |     |          | 2662 | Glyceraldehyde 3-phosphate dehydrogenase               | -0.465 | -0.974 |
|          |     | Negative | 4134 | Osmotin-like protein                                   | -0.562 | -0.827 |
|          |     |          | 4467 | Glyceraldehyde-3-phosphate dehydrogenase               | -0.377 | -0.796 |
|          |     |          | 4514 | Wound/stress protein                                   | -0.442 | -0.833 |
